# Supplementary material
Source: Research Square preprint supplement (doi:10.21203/rs.3.rs-10044269/v1)
Supplement: Supplementary file 1 [file fb7a59819567a6014bd7570a.docx]

**Supplementary tables**

**Table 7: Pooled prevalence of RVF per country by diagnostic tests**

| ***Country*** | ***Diagnostic test*** | ***K*** | ***Pooled prevalence*** | ***95% CI*** | ***I²*** |
| --- | --- | --- | --- | --- | --- |
| *DRC* | ELISA | 8 | 5.2% | 3.4–7.8% | 91.2% |
| *DRC* | RT-PCR | 3 | 1.9% | 0.8–4.4% | 0.0% |
| *Kenya* | ELISA | 20 | 9.4% | 6.3–13.7% | 98.3% |
| *Kenya* | IFA | 1 | 81.1% | 69.8–88.8% | NA |
| *Kenya* | RT-PCR | 3 | 1.1% | 0.2–5.6% | 64.8% |
| *Kenya* | Virus Neutralization Test | 1 | 22.1% | 18.9–25.7% | NA |
| *Rwanda* | ELISA | 1 | 16.9% | 14.1–20.1% | NA |
| *Somalia* | ELISA | 7 | 2.9% | 1.4–5.8% | 97.1% |
| *Somalia* | RT-PCR | 1 | 0.0% |  |  |
| *Sudan* | ELISA | 1 | 38.7% | 33.6–44.2% | NA |
| *Sudan* | ELISA | 6 | 11.0% | 6.8–17.3% | 81.7% |
| *Sudan* | RT-PCR | 2 | 3.4% | 0.1–58.3% | 85.8% |
| *Sudan* | Virus Neutralization | 1 | 14.0% | 12.7–15.5% | NA |
| *Tanzania* | ELISA | 18 | 9.5% | 6.3–14.1% | 98.3% |
| *Tanzania* | Plaque reduction neutralization test | 2 | 14.4% | 3.7–42.3% | 97.9% |
| *Tanzania* | RT-PCR | 5 | 11.0% | 4.2–26.0% | 79.1% |
| *Uganda* | ELISA | 10 | 9.4% | 7.8–11.3% | 88.1% |
| *Uganda* | RT-PCR | 1 | 1.8% | 0.4–8.4% | NA |
| *Uganda* | Virus Neutralization Test | 1 | 24.3% | 21.3–27.6% | NA |

**Table 8: Comparative analysis of studies that used both serological and molecular diagnostic tests**

| ***Country*** | ***Serological*** | | ***Molecular*** | ***Period*** | ***Reference*** |
| --- | --- | --- | --- | --- | --- |
| **IgG** | **IgM** |
| *Kenya* | **7.80%** | **4.20%** | **2.10%** | **Outbreak** | **Munyua 2010** |
| *Tanzania* | **39.50%** | **-** | **17.60%** | **Outbreak** | **Chengula 2014** |
| *Kenya* | **34.10%** | **5.90%** | **5.90%** | **IEP** | **Lichoti 2014** |
| *Tanzania* | **12.69%** | **-** | **5.40%** | **IEP** | **Kifaro 2014** |
| *Democratic Republic of Congo* | **6.22%** | **0.0%** | **1.80%** | **IEP** | **Georges 2018** |
| *Democratic Republic of Congo* | **12.40%** | **1.50%** | **0.49%** | **IEP** | **Tshilenge 2019** |
| *Democratic Republic of Congo* | **6.04%** | **1.85%** | **1.85%** | **IEP** | **Tshilenge 2019** |
| *Uganda* | **9.60%** | **-** | **1.20%** | **Outbreak** | **Shoemaker 2019** |
| *Tanzania* | **7.20%** | **0.20%** | **0.00%** | **IEP** | **Salekwa 2019** |
| *Sudan* | **14.20%** | **-** | **15.23%** | **IEP** | **El-Hajj 2021** |
| *Sudan* | **16.6%** | **-** | **0.00%** | **IEP** | **Bahgy 2018** |
| *Kenya* | **4.40%** | **-** | **0.00%** | **IEP** | **Situma 2024** |
| *Tanzania* | **93.00%** | **-** | **21.00%** | **Outbreak** | **deGlanville 2022** |
| *Tanzania* | **9.57%** | **1.1%** | **0.0%** | **IEP** | **Sumaye 2025** |
| *Somalia* | **4.2%** | **1.4%** | **0.0%** | **IEP** | **Hassan-Kaddle 2025** |

**Table 9: RVF prevalence among studies that used both IgG and IgM tests**

| ***Country*** | ***IgG*** | ***IgM*** | ***Period*** | ***Reference*** |
| --- | --- | --- | --- | --- |
| *Kenya* | **7.80%** | **4.20%** | **Outbreak** | **Munyua 2010** |
| *Kenya* | **34.10%** | **5.90%** | **IEP** | **Lichoti 2014** |
| *Tanzania* | **4.74%** | **4.74%** | **IEP** | **Sumaye 2013** |
| *Tanzania* | **25.80%** | **0.00%** | **IEP** | **Sindato 2015** |
| *Democratic Republic of Congo* | **6.22%** | **1.80%** | **IEP** | **Georges 2018** |
| *Kenya* | **13.10%** | **1.40%** | **IEP** | **Owange 2014** |
| *Democratic Republic of Congo* | **12.37%** | **1.47%** | **IEP** | **Tshilenge 2019** |
| *Democratic Republic of Congo* | **6.04%** | **1.85%** | **IEP** | **Tshilenge 2019** |
| *Tanzania* | **29.20%** | **8.40%** | **IEP** | **Matiko 2018** |
| *Tanzania* | **7.70%** | **0.20%** | **IEP** | **Salekwa 2019** |
| *Sudan* | **21.40%** | **10.70%** | **IEP** | **Ramadan 2022** |
| *Kenya* | **12.20%** | **0.10%** | **Outbreak** | **Omani 2024** |
| *Tanzania* | **9.57%** | **1.1%** | **IEP** | **Sumaye 2025** |
| *Somalia* | **4.2%** | **1.4%** | **IEP** | **Hassan-Kaddle 2025** |
